# Supplementary material
Source: ML conference proceedings conference paper supplement (https://aclanthology.org/2026.semeval-1.40)

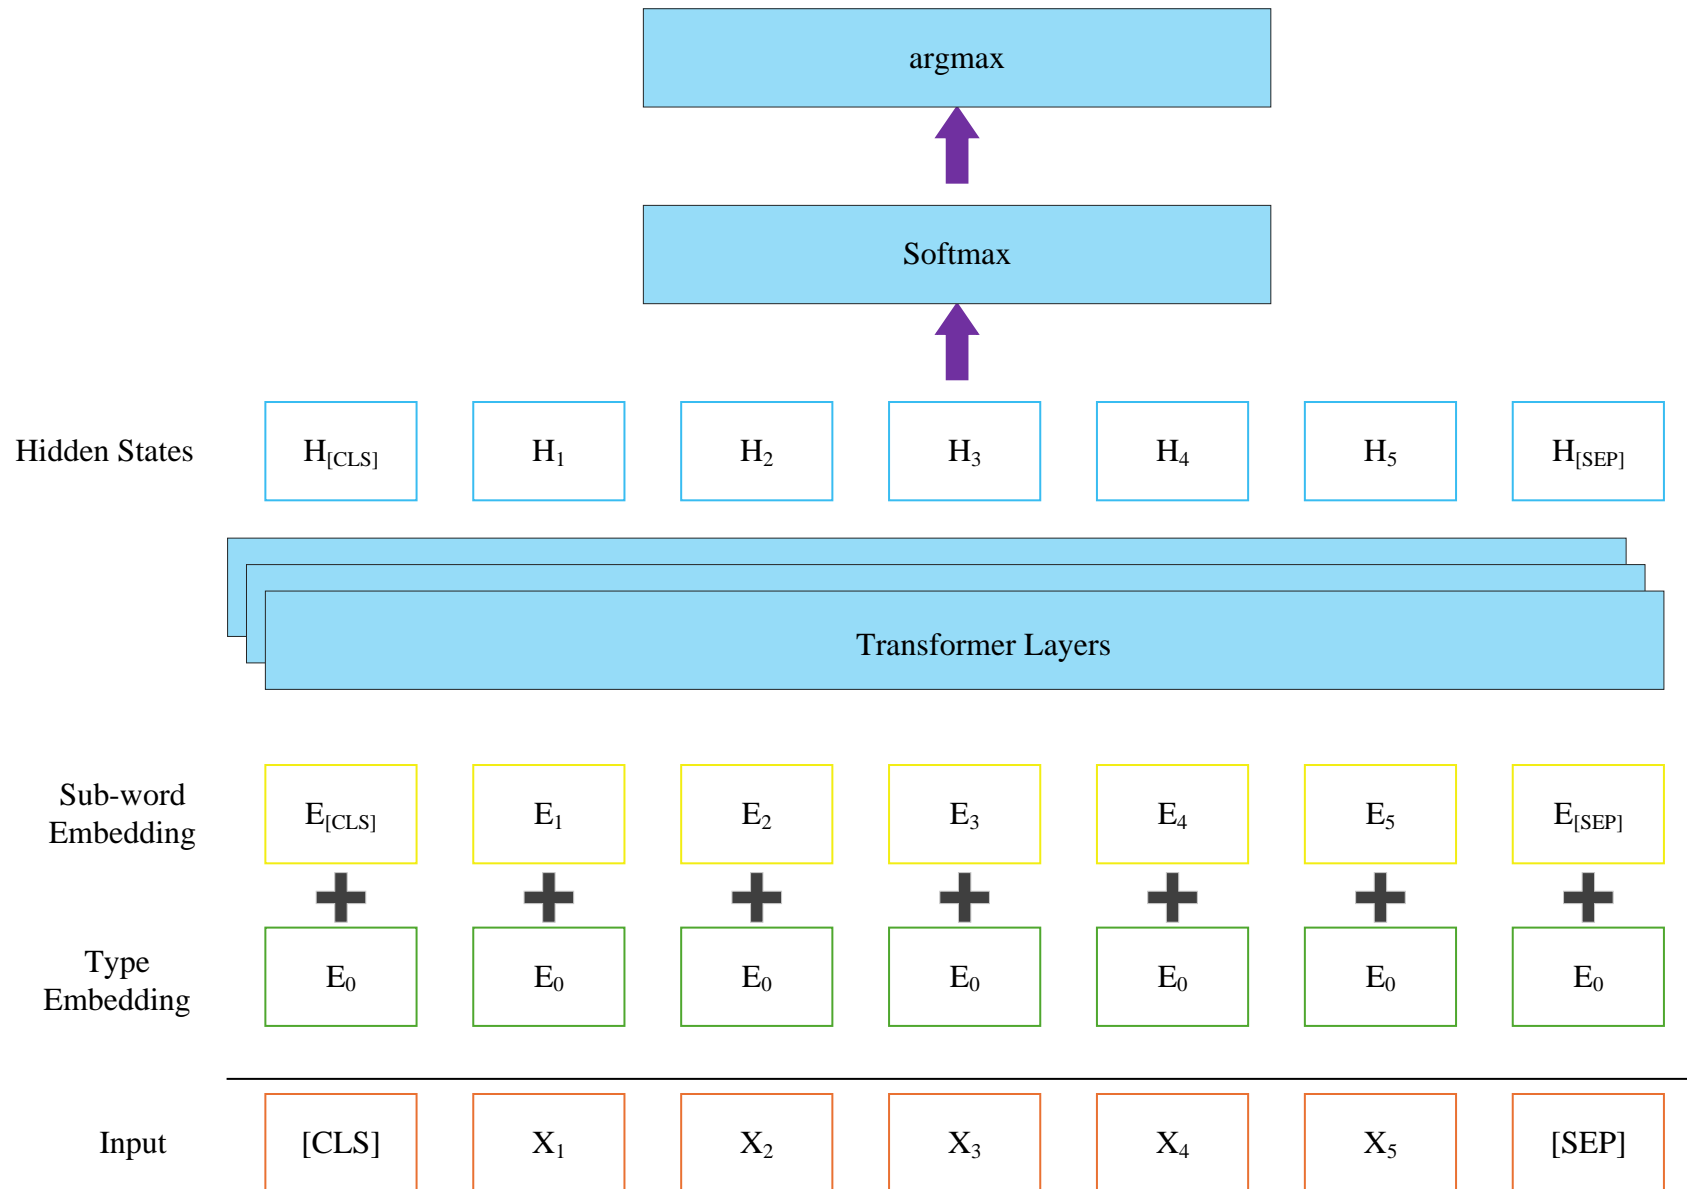

Supplement: SupplementaryMaterial [file stru.pdf › stru.pdf]
